# Supplementary material for: Relationship between sarcopenia/paravertebral muscles and the incidence of vertebral refractures following percutaneous kyphoplasty: a retrospective study
Source: BMC Musculoskelet Disord. 2022 Sep 22;23:879. doi: 10.1186/s12891-022-05832-6 (PMC9494877; doi:10.1186/s12891-022-05832-6)
Supplement: Supplementary file 1 — Additional file 1. [file 12891_2022_5832_MOESM1_ESM.xlsx]

## Sheet: Sheet1
Sex	Age	MNA	Height	Weight	BMI	Diabetes	AMI	Handgrip strength	Sacorpenia	PVM	BMD	TL-junction	OVCRF
1	82	1	1.57	48	19.4734	0	7.9	15.2	0	54.9	-1.7	0	1
1	80	1	1.52	46	19.91	0	8.3	14.2	0	47.6	-2.4	1	1
0	82	2	1.57	50	20.2848	1	5.8	12.8	0	58	-2.1	0	1
0	87	2	1.55	46	19.1467	0	6	10.8	0	54	-2.9	0	1
0	79	2	1.53	47	20.0777	0	6.1	12.6	0	58.2	-1.6	0	1
0	84	2	1.54	48	20.2395	1	6.2	12.4	0	61	-2.2	1	1
1	81	3	1.61	54	20.8325	0	7.2	14.5	0	45.5	-1.7	1	1
1	82	3	1.62	54	20.5761	0	7.7	13.4	0	47.9	-2.7	0	1
0	60	3	1.61	48	18.5178	1	5.5	12.1	0	48.2	-2.8	0	1
0	85	3	1.55	47	19.563	1	5.5	12.4	0	47.8	-3.1	0	1
0	81	3	1.53	47	20.0777	0	5.5	12.3	0	56.3	-2.6	0	1
0	81	3	1.54	51	21.5045	0	5.5	11.3	0	50.7	-2.9	1	1
0	83	3	1.53	46	19.6506	1	5.5	12.8	0	51.2	-2.8	0	1
0	75	3	1.62	52	19.8141	0	5.8	12.1	0	56.8	-2.9	0	1
0	84	3	1.6	52	20.3125	0	5.8	12.6	0	56.8	-2.8	1	1
0	80	3	1.61	53	20.4467	0	6.1	12.7	0	46.9	-3.5	1	1
1	79	3	1.54	45	18.9745	0	8.8	12.6	0	56.3	-2.7	1	0
1	81	1	1.67	56	20.0796	1	7.9	12.6	0	46.6	-1.8	1	0
1	80	1	1.62	53	20.1951	0	7.2	14.6	0	46.3	-1.8	0	0
1	80	1	1.48	46	21.0007	0	7.2	13.6	0	50.1	-2.2	1	0
1	75	1	1.59	47	18.591	0	8.4	13.7	0	47.4	-1.9	1	0
1	77	1	1.53	57	24.3496	0	7.7	15.3	0	44.1	-1.8	0	0
0	72	1	1.53	45	19.2234	0	5.4	12.5	0	48.7	-1.9	0	0
0	69	1	1.6	53	20.7031	0	6.2	12.1	0	52.3	-2.2	1	0
0	76	1	1.59	52	20.5688	0	5.5	11.7	0	51.2	-3.1	1	0
0	69	1	1.53	45	19.2234	0	6.7	12.7	0	48.1	-3.2	0	0
0	77	1	1.6	53	20.7031	0	5.5	10.2	0	45.3	-2.3	1	0
0	81	1	1.59	50	19.7777	0	7.4	14.2	0	49.3	-1.8	0	0
0	72	1	1.53	47	20.0777	1	6	12.5	0	45	-1.9	1	0
0	65	1	1.65	56	20.5693	0	6.2	11	0	57.8	-2.4	0	0
0	75	1	1.59	54	21.3599	0	6.9	13.3	0	46.2	-2.3	0	0
0	76	1	1.56	50	20.5457	0	6.4	13.1	0	45.6	-2.1	0	0
0	78	1	1.59	53	20.9644	0	7	13.1	0	43.5	-1.7	1	0
0	81	1	1.46	46	21.58	0	6.5	12.7	0	53.8	-1.8	1	0
0	81	1	1.59	51	20.1733	0	7.5	13.1	0	50.4	-1.9	1	0
0	71	1	1.6	54	21.0938	0	7.1	13.1	0	51.2	-2	1	0
0	80	1	1.69	55	19.257	0	7.4	12.7	0	50.1	-2.3	0	0
0	79	1	1.57	53	21.5019	0	8.7	11.6	0	45.8	-1.8	1	0
1	79	2	1.56	52	21.3675	0	7	14.5	0	48.4	-2	0	0
1	73	2	1.64	52	19.3337	0	7.1	13.5	0	46.7	-2.6	1	0
1	78	2	1.65	54	19.8347	0	7.1	14.1	0	48.1	-2	1	0
1	79	2	1.54	52	21.9261	0	8.6	14.5	0	47.8	-2.1	1	0
1	76	2	1.6	52	20.3125	0	7.4	13.8	0	50.9	-1.7	1	0
1	79	2	1.61	54	20.8325	0	7.8	14.2	0	47.4	-1.8	1	0
1	82	2	1.69	57	19.9573	0	7.8	14.1	0	41.2	-1.4	1	0
1	80	2	1.53	52	22.2137	1	7.8	14.1	0	47.7	-2.4	1	0
1	73	2	1.6	51	19.9219	0	8.8	15.2	0	42.9	-2.3	1	0
1	75	2	1.57	52	21.0962	0	7.8	12.5	0	48.7	-1.9	0	0
1	75	2	1.6	54	21.0938	1	7.9	14.5	0	42.7	-1.8	1	0
1	77	2	1.67	56	20.0796	0	8.1	14.5	0	47.2	-2.3	1	0
1	80	2	1.62	52	19.8141	0	8.1	14.6	0	46.4	-1.8	1	0
1	75	2	1.64	55	20.4491	0	8.1	14.2	0	47.1	-2	1	0
1	80	2	1.63	56	21.0772	0	8.1	14.8	0	49.9	-1.7	1	0
1	78	2	1.61	55	21.2183	0	8.1	13.7	0	41.3	-1.9	0	0
1	76	2	1.67	56	20.0796	0	8.2	13.4	0	47.1	-1.8	1	0
1	81	2	1.61	52	20.061	1	8.2	14.7	0	39.5	-1.8	1	0
1	75	2	1.57	46	18.662	0	8.9	14.8	0	48.1	-1.7	1	0
1	72	2	1.56	61	25.0657	0	10.2	16.1	0	42.6	-3	0	0
0	80	2	1.53	45	19.2234	0	5.4	11.8	0	50.3	-1.8	1	0
0	48	2	1.6	53	20.7031	0	6	10.6	0	47.6	-3.5	1	0
0	70	2	1.54	43	18.1312	0	5.5	12.3	0	40.7	-3.1	1	0
0	77	2	1.63	51	19.1953	0	6.4	11.3	0	48.7	-2.2	1	0
0	80	2	1.57	46	18.662	0	5.6	11.5	0	45	-1.9	0	0
0	71	2	1.56	54	22.1893	0	6.3	11.2	0	50.1	-2.4	0	0
0	71	2	1.56	48	19.7239	0	5.6	12.1	0	46.6	-2.4	1	0
0	74	2	1.61	52	20.061	0	5.6	12.4	0	48.9	-2.3	0	0
0	79	2	1.55	48	19.9792	0	7	12.7	0	47.5	-2.6	1	0
0	77	2	1.56	48	19.7239	0	5.6	12.3	0	47.3	-1.8	0	0
0	75	2	1.54	50	21.0828	0	5.6	12.5	0	48.4	-1.8	0	0
0	81	2	1.57	54	21.9076	1	7.1	11.9	0	48.4	-1.8	1	0
0	78	2	1.49	45	20.2694	0	5.6	10.6	0	47.8	-2.1	0	0
0	73	2	1.55	47	19.563	0	5.7	12.2	0	51.9	-2.4	0	0
0	70	2	1.59	50	19.7777	0	5.7	10.9	0	48.4	-2.2	1	0
0	79	2	1.52	43	18.6115	0	6.4	12.4	0	49	-1.9	1	0
0	82	2	1.54	45	18.9745	1	5.7	12.2	0	46.8	-1.9	0	0
0	80	2	1.54	52	21.9261	0	5.8	12.1	0	49.8	-2.2	1	0
0	80	2	1.57	51	20.6905	1	5.8	12.7	0	52.4	-2.2	1	0
0	76	2	1.57	48	19.4734	0	6.6	12.5	0	50.9	-2.4	0	0
0	77	2	1.47	43	19.8991	0	5.9	11.5	0	48.2	-2.4	0	0
0	79	2	1.56	51	20.9566	0	6	12.4	0	51.8	-2.4	1	0
0	76	2	1.47	42	19.4363	1	7	13.2	0	45.9	-2.4	0	0
0	80	2	1.54	49	20.6612	0	6.1	13.4	0	49	-1.9	0	0
0	77	2	1.54	49	20.6612	0	6.9	13.1	0	49.2	-1.7	1	0
0	77	2	1.54	51	21.5045	0	6.1	12.6	0	53.5	-2.1	0	0
0	81	2	1.57	51	20.6905	0	6.1	13.1	0	49.1	-2.3	1	0
0	81	2	1.55	50	20.8117	0	7	12.5	0	46.2	-2.6	0	0
0	72	2	1.57	50	20.2848	0	6.2	12.6	0	48.5	-2.1	1	0
0	80	2	1.54	46	19.3962	0	6.2	13.4	0	52.5	-1.4	1	0
0	73	2	1.54	54	22.7694	0	6.2	11.6	0	48.5	-2.1	1	0
0	80	2	1.57	48	19.4734	0	7.3	12.2	0	50.7	-2.3	0	0
0	60	2	1.45	46	21.8787	0	6.3	12.3	0	52.8	-2.4	1	0
0	73	2	1.56	51	20.9566	0	6.5	13.3	0	46.2	-1.8	1	0
0	76	2	1.52	51	22.0741	0	6.6	11.9	0	56.2	-2.4	0	0
0	76	2	1.64	54	20.0773	0	6.9	11.3	0	63.4	-2.4	1	0
0	79	2	1.61	53	20.4467	0	7.1	13.4	0	48.2	-2.1	1	0
0	79	2	1.5	46	20.4444	0	7.8	12.6	0	48.8	-1.7	0	0
1	67	3	1.72	57	19.2672	0	7.1	13.9	0	45.8	-2.8	1	0
1	78	3	1.65	58	21.3039	0	7.1	13.4	0	48.1	-2.4	1	0
1	80	3	1.6	55	21.4844	0	8.8	12.4	0	49.1	-1.7	1	0
1	83	3	1.62	48	18.2899	0	7.5	14.1	0	50.7	-2.8	1	0
0	75	3	1.53	45	19.2234	0	5.4	12.3	0	47.2	-2.9	1	0
0	82	3	1.56	51	20.9566	0	6.7	12.6	0	49.2	-2.2	0	0
0	70	3	1.61	48	18.5178	0	5.4	12.8	0	48.2	-1.9	0	0
0	79	3	1.57	55	22.3133	0	6.8	10.2	0	50.2	-2.4	1	0
0	55	3	1.54	43	18.1312	0	5.5	11.9	0	53.2	-2.1	1	0
0	80	3	1.53	45	19.2234	1	6.5	11.9	0	48.7	-2.1	1	0
0	73	3	1.58	52	20.83	0	6	11.8	0	49.9	-2.3	1	0
0	80	3	1.57	52	21.0962	0	7.1	12.6	0	47.2	-2.3	1	0
0	77	3	1.56	50	20.5457	0	5.6	13	0	48.5	-2.5	0	0
0	75	3	1.57	51	20.6905	0	6.4	12.7	0	47.4	-2.3	1	0
0	76	3	1.56	50	20.5457	0	5.7	12.7	0	48.8	-2.1	1	0
0	82	3	1.51	45	19.736	1	6.5	11.8	0	55.9	-2.3	1	0
0	75	3	1.48	42	19.1746	0	5.8	10.9	0	45.3	-1.7	0	0
0	77	3	1.54	49	20.6612	0	5.8	12.3	0	51.3	-1.9	0	0
0	70	3	1.54	50	21.0828	0	7.1	11.5	0	50.4	-1.5	0	0
0	78	3	1.56	44	18.0802	1	6.1	11.3	0	46.5	-2.9	0	0
0	76	3	1.54	48	20.2395	0	6.1	12.5	0	44.5	-1.9	0	0
0	79	3	1.55	51	21.2279	0	6.1	13.1	0	51.2	-2.2	1	0
0	81	3	1.65	54	19.8347	0	6.2	12.5	0	51.2	-2.2	0	0
0	80	3	1.57	49	19.8791	0	6.2	11.4	0	57.6	-2.6	0	0
0	79	3	1.62	50	19.052	0	6.4	11	0	48.7	-1.9	0	0
0	76	3	1.57	54	21.9076	0	6.9	12.2	0	43.2	-1.9	0	0
0	77	3	1.57	50	20.2848	0	7.9	12.7	0	49.2	-2.1	0	0
0	82	1	1.54	50	21.0828	0	6.3	11.8	0	51.4	-1.7	0	0
0	74	1	1.6	50	19.5312	0	5.9	12.5	0	46.5	-1.6	1	0
1	85	1	1.63	58	21.83	0	8.1	12.6	0	41.2	-1.6	1	0
0	78	2	1.49	43	19.3685	0	6.2	12.3	0	51.4	-1.7	0	0
1	82	2	1.6	54	21.0938	0	8.3	12.1	0	48.9	-1.4	0	0
1	64	2	1.68	60	21.2585	0	7.9	15.1	0	43.2	-1.8	0	0
0	80	3	1.58	50	20.0288	0	6.4	9.6	0	53.2	-1.9	0	0
0	71	3	1.56	43	17.6693	0	6.4	10.7	0	48.5	-1.7	0	0
0	72	3	1.56	46	18.902	0	6	12.2	0	48.7	-3	1	0
0	82	3	1.53	45	19.2234	0	6.5	10.5	0	58.5	-2.4	1	0
0	75	3	1.56	46	18.902	0	5.6	12.3	0	49.8	-1.7	1	0
0	72	3	1.56	45	18.4911	0	5.8	11.1	0	45	-3.1	1	0
0	78	3	1.53	47	20.0777	0	5.9	12	0	48.7	-2.9	0	0
1	77	3	1.6	54	21.0938	0	8	13.3	0	48.2	-1.8	1	0
1	78	3	1.56	48	19.7239	0	8.1	12.8	0	56.8	-2.6	1	0
1	75	3	1.57	53	21.5019	0	7.6	13.4	0	49.9	-1.9	1	0
1	82	3	1.54	50	21.0828	0	7.4	12.4	0	46	-3.7	0	0
1	79	3	1.53	43	18.369	0	7.8	13.2	0	53.8	-2.5	1	0
1	77	3	1.63	49	18.4425	0	8.1	12.4	0	30.1	-2.1	1	0
1	80	3	1.62	52	19.8141	0	8.1	11	0	52.3	-2.8	1	0
1	56	3	1.55	48	19.9792	0	7.9	13.5	0	50	-2.2	1	0
1	75	3	1.62	55	20.9572	0	8.3	12.4	0	46.5	-2.2	0	0
0	76	1	1.57	45	18.2563	0	5.2	11	1	58.9	-3.2	1	1
0	75	2	1.59	45	17.7999	1	4.5	10.2	1	61.1	-2.9	0	1
0	82	2	1.52	40	17.313	0	4.5	12.1	1	54.9	-3.3	1	1
0	80	2	1.57	46	18.662	0	4.9	9.5	1	60.2	-3.5	1	1
0	84	2	1.61	50	19.2894	0	4.9	12	1	58.1	-3.6	1	1
0	85	2	1.56	45	18.4911	0	4.2	12	1	58.6	-2.7	1	1
0	81	2	1.57	52	21.0962	1	4.8	12.7	1	52.3	-3	0	1
0	78	2	1.6	44	17.1875	1	5.2	10.2	1	56.6	-2.8	0	1
0	72	2	1.54	45	18.9745	0	5.2	11.1	1	52.7	-2.6	1	1
0	81	3	1.52	40	17.313	1	3.9	9.6	1	59.9	-3.4	1	1
0	78	3	1.54	42	17.7096	0	4.2	10.1	1	57.6	-2.8	1	1
0	88	3	1.62	42	16.0037	1	4.2	9.9	1	63.1	-3.6	1	1
0	82	3	1.54	43	18.1312	0	4.4	10.8	1	60.3	-2.9	1	1
0	83	3	1.56	43	17.6693	1	4.4	10.6	1	59.9	-2.7	1	1
0	76	3	1.53	43	18.369	0	4.4	8.9	1	59.4	-2.9	1	1
0	82	3	1.56	43	17.6693	0	4.2	10.2	1	61.3	-3.4	0	1
0	73	3	1.53	44	18.7962	1	4.8	11.2	1	52.3	-2.6	0	1
0	85	3	1.44	39	18.8079	0	4.8	10.1	1	60.5	-3	0	1
0	83	3	1.57	46	18.662	1	4.8	10.7	1	56.5	-3.1	0	1
0	80	3	1.57	43	17.4449	0	4.4	11.3	1	58.7	-3.6	1	1
0	87	3	1.56	46	18.902	0	4.9	10.7	1	53.2	-3.6	1	1
0	70	3	1.56	50	20.5457	1	4.9	11.7	1	57.6	-3.1	0	1
0	82	3	1.51	43	18.8588	0	4.9	11.3	1	51.4	-2.5	1	1
0	82	3	1.58	46	18.4265	0	5	11.8	1	60.7	-2.8	0	1
0	93	3	1.56	48	19.7239	1	5	9.9	1	59.6	-3.9	1	1
0	81	3	1.55	50	20.8117	0	5.1	10.1	1	57.2	-3.3	1	1
0	82	3	1.53	44	18.7962	1	5.1	11.9	1	58.8	-3.2	0	1
0	84	3	1.54	45	18.9745	0	5.1	11.2	1	56.5	-2.9	1	1
0	79	3	1.57	48	19.4734	1	5.2	12.1	1	58.3	-2.8	1	1
0	77	3	1.59	46	18.1955	0	5.2	9.9	1	54.7	-3.3	0	1
0	82	3	1.54	45	18.9745	0	3.7	10.8	1	56.8	-3.1	0	1
0	85	3	1.52	45	19.4771	0	4.6	11.8	1	58.7	-3.1	0	1
0	80	3	1.54	52	21.9261	1	5.2	12.2	1	56.7	-3.1	1	1
0	79	3	1.58	47	18.8271	0	5.2	11.8	1	61.4	-2.7	0	1
0	85	3	1.53	45	19.2234	1	5.2	12.1	1	54.7	-3.4	1	1
0	80	3	1.61	46	17.7462	1	4.6	11.4	1	56.9	-3.3	1	1
0	80	3	1.58	43	17.2248	1	5.3	12	1	53.3	-2.8	1	1
0	80	3	1.6	48	18.75	0	5	11.3	1	51.1	-2.3	0	1
0	83	3	1.56	46	18.902	1	5.3	10.8	1	58.7	-3.7	0	1
0	86	3	1.51	44	19.2974	0	5.3	10.6	1	61.4	-2.9	0	1
0	80	3	1.53	40	17.0874	1	5	11.1	1	54.1	-3.2	1	1
1	82	3	1.69	45	15.7558	1	5.1	10.3	1	64.1	-3.4	1	1
1	83	3	1.62	45	17.1468	1	5.9	11.7	1	62.7	-3.3	0	1
1	81	3	1.6	50	19.5312	0	5.9	12.5	1	57.2	-2.7	1	1
1	83	3	1.6	50	19.5312	1	6	12	1	54.3	-3.2	0	1
1	82	3	1.52	43	18.6115	0	6.1	13.2	1	57.2	-3.2	1	1
1	81	3	1.55	47	19.563	0	6.1	12.3	1	55.2	-3.2	1	1
1	82	3	1.53	45	19.2234	1	6.3	12.5	1	51.2	-3.2	1	1
1	84	3	1.53	43	18.369	0	6.7	12.4	1	58.9	-3.2	0	1
1	73	2	1.57	50	20.2848	0	5.1	13.7	1	56.7	-3.2	1	1
1	79	2	1.62	52	19.8141	1	5.2	13.7	1	47.7	-2.9	1	1
1	84	2	1.51	47	20.6131	0	6	14.1	1	54.9	-2.9	0	1
0	85	2	1.7	50	17.301	0	4.4	11.9	1	48.8	-3.1	0	1
0	81	2	1.54	49	20.6612	1	4.2	12.1	1	47.5	-3.4	0	1
0	77	2	1.45	39	18.5493	0	4.2	10.1	1	59.1	-3.5	1	1
0	78	2	1.58	50	20.0288	1	5	11.8	1	58.7	-3.1	1	1
0	84	2	1.54	46	19.3962	0	4.5	12.3	1	57.7	-3.1	1	1
0	86	2	1.54	50	21.0828	1	4.8	12.5	1	59	-3.5	1	1
1	75	1	1.67	52	18.6453	0	6.8	12.9	1	50.9	-1.7	1	0
0	77	2	1.55	46	19.1467	0	4.6	10.6	1	55	-2.3	1	0
0	75	2	1.58	48	19.2277	0	5.1	12.4	1	50.5	-2.4	0	0
0	75	2	1.54	43	18.1312	0	5.2	10.3	1	49.5	-2.4	1	0
0	77	2	1.53	43	18.369	1	5.2	12.1	1	59	-2.1	1	0
1	79	2	1.52	46	19.91	0	6.8	13.6	1	44.3	-2.3	1	0
0	80	3	1.5	42	18.6667	0	4.4	11.1	1	54.1	-3.1	1	0
0	79	3	1.6	43	16.7969	1	4.8	9.9	1	56.9	-3	1	0
0	82	3	1.54	42	17.7096	0	4.9	10.5	1	49.7	-3.1	1	0
0	86	3	1.54	45	18.9745	0	5.1	10.9	1	50.3	-1.9	1	0
1	82	3	1.72	58	19.6052	0	6.8	12.1	1	58.7	-2.5	0	0
